# Supplementary material for: Efficient Bioremediation of Petroleum-Contaminated Soil by Immobilized Bacterial Agent of Gordonia alkanivorans W33
Source: MDPI journal article supplement (doi:10.3390/bioengineering10050561), 2023-05-08
Supplement: s1 [file s1]

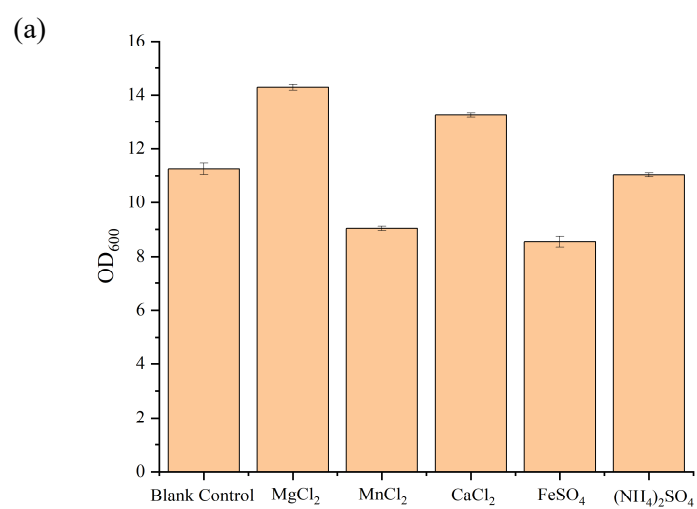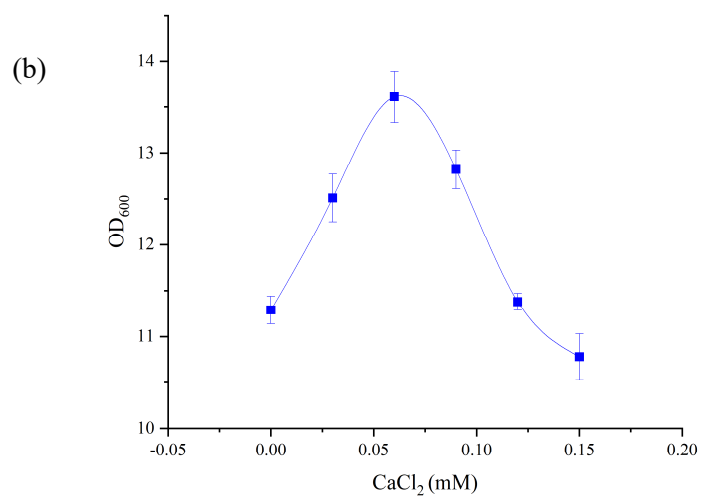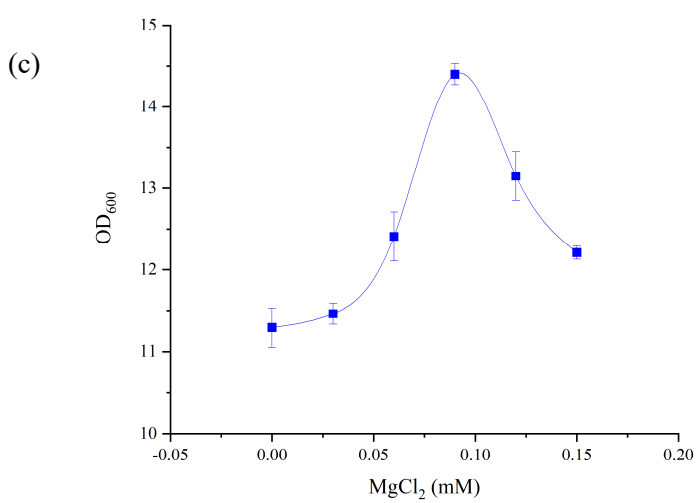

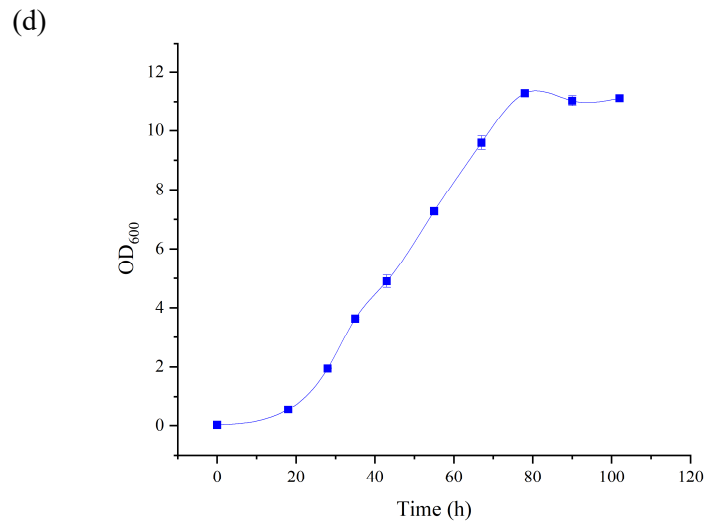

**Figure S1.** The effect of adding inorganic salts on the biomass of W33. (a) Effect of adding 0.06mM MgCl<sub>2</sub>, MnCl<sub>2</sub>, CaCl<sub>2</sub>, FeSO<sub>4</sub> and (NH<sub>4</sub>)<sub>2</sub>SO<sub>4</sub> alone on W33 biomass; (b) Effect of CaCl<sub>2</sub> concentration on W33 biomass; (c) Effect of MgCl<sub>2</sub> concentration on W33 biomass; (d) W33 growth curve without adding inorganic salts.

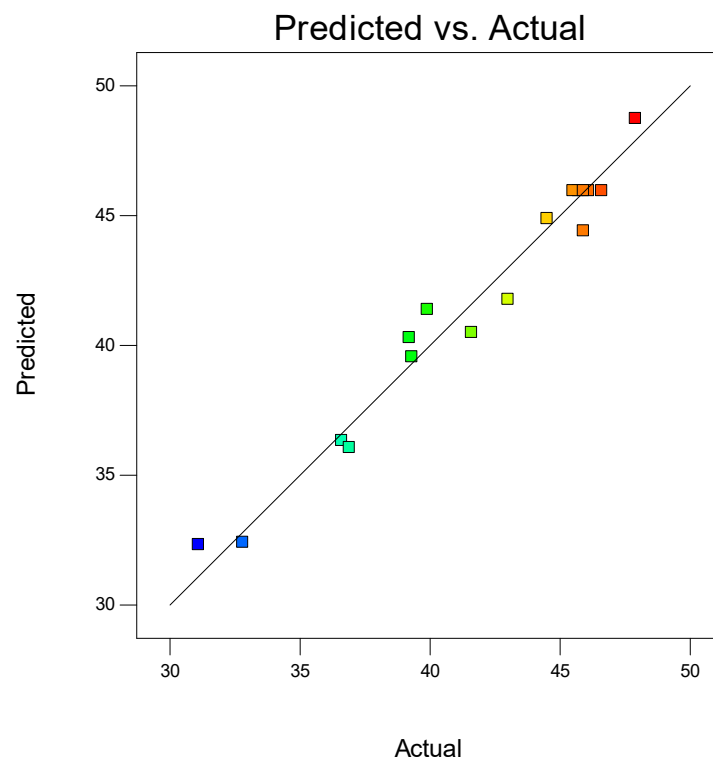

**Figure S2.** Fitness of predictive value and experimental value of final biomass

**Table S1.** Response surface test factor level table

| Level | Factor      |                           |                           |
|-------|-------------|---------------------------|---------------------------|
|       | Time (A) /h | MgCl <sub>2</sub> (B) /mM | CaCl <sub>2</sub> (C) /mM |
| -1    | 72          | 0.06                      | 0.03                      |
| 0     | 80          | 0.09                      | 0.06                      |
| 1     | 88          | 0.12                      | 0.09                      |

**Table S2.** Response surface test plan design and results

| Run | A  | B  | C  | Y    |
|-----|----|----|----|------|
| 1   | 1  | 1  | 0  | 44.5 |
| 2   | 1  | 0  | 1  | 43.0 |
| 3   | 1  | 0  | -1 | 39.2 |
| 4   | 0  | 1  | -1 | 45.9 |
| 5   | 0  | 0  | 0  | 46.6 |
| 6   | 1  | -1 | 0  | 36.6 |
| 7   | -1 | -1 | 0  | 32.8 |
| 8   | -1 | 0  | 1  | 41.6 |
| 9   | 0  | 0  | 0  | 46.1 |
| 10  | 0  | 1  | 1  | 47.9 |
| 11  | 0  | -1 | -1 | 36.9 |
| 12  | -1 | 1  | 0  | 39.3 |
| 13  | -1 | 0  | -1 | 31.1 |
| 14  | 0  | 0  | 0  | 45.7 |
| 15  | 0  | 0  | 0  | 45.5 |
| 16  | 0  | -1 | 1  | 39.9 |
| 17  | 0  | 0  | 0  | 45.9 |

**Table S3.** Results of variance analysis

| Source of variance                   | Sum of square | Degree of freedom | Mean square | F-Value | p-Value  | Significant t |
|--------------------------------------|---------------|-------------------|-------------|---------|----------|---------------|
| Model                                | 400.53        | 9                 | 44.5        | 25.12   | 0.0002   | **            |
| A-Time                               | 42.78         | 1                 | 42.78       | 24.15   | 0.0017   | **            |
| B-concentration of MgCl <sub>2</sub> | 123.24        | 1                 | 123.24      | 69.58   | < 0.0001 | **            |
| C concentration of CaCl <sub>2</sub> | 46.56         | 1                 | 46.56       | 26.29   | 0.0014   | **            |
| AB                                   | 0.49          | 1                 | 0.49        | 0.28    | 0.6152   |               |
| AC                                   | 11.22         | 1                 | 11.22       | 6.34    | 0.04     | *             |
| BC                                   | .25           | 1                 | 0.25        | 0.14    | 0.7183   |               |
| A <sup>2</sup>                       | 141.28        | 1                 | 141.28      | 79.76   | < 0.0001 | **            |
| B <sup>2</sup>                       | 14.68         | 1                 | 14.68       | 8.29    | 0.0237   | *             |
| C <sup>2</sup>                       | 8.76          | 1                 | 8.76        | 4.95    | 0.0615   |               |
| Residual                             | 12.4          | 7                 | 1.77        |         |          |               |
| Missing item                         | 11.69         | 3                 | 3.9         | 21.89   | 0.0061   | **            |
| Pure error                           | 0.71          | 4                 | 0.18        |         |          |               |
| Total deviation                      | 412.93        | 16                |             |         |          |               |

Note: “\*\*\*” means very significant ( $p < 0.01$ ), “\*\*” means significant ( $0.01 < p < 0.05$ )
